# Supplementary material
Source: PubMed Central journal article supplement (PMC4570970)
Supplement: NIHMS719196-supplement-Supplemental_figures.pdf [file NIHMS719196-supplement-Supplemental_figures.pdf]

# Formation of a Novel Macrocyclic Alkaloid from the Unnatural Farnesyl Diphosphate Analogue Anilinogeranyl Diphosphate by 5-Epi-Aristolochene Synthase

Kathleen A. Rising<sup>1¶</sup>, Charisse M. Crenshaw<sup>2¶</sup>, Hyun Jo Koo<sup>2¶</sup>, Thangaiah Subramanian<sup>3¶</sup>, Kareem A. H. Chehade<sup>3</sup>, Courtney Starks<sup>2</sup>, Keith D. Allen<sup>1</sup>, Douglas A. Andres<sup>3</sup>, H. Peter Spielmann<sup>3,4,5,6</sup>, Joseph P. Noel<sup>2</sup> and Joe Chappell<sup>1</sup>

Departments of <sup>1</sup>Pharmaceutical Sciences; <sup>3</sup>Cellular and Molecular Biochemistry, <sup>4</sup>Chemistry, <sup>5</sup>Center for Structural Biology, <sup>6</sup>Markey Cancer Center, University of Kentucky, Lexington; <sup>2</sup>Howard Hughes Medical Institute, Salk Institute

## ELECTRONIC SUPPORTING INFORMATION

|                                                                                                 |   |
|-------------------------------------------------------------------------------------------------|---|
| Table S1 Crystallographic Data collection and refinement statistics.....                        | 2 |
| Table S2 Kinetic constants determined for catalytic turnover of FPP.....                        | 3 |
| Table S3 Kinetic constants determined for catalytic turnover of AGPP.....                       | 3 |
| Figure S1 Lineweaver-Burk plots of AGPP inhibition of FPP to 5-epi-aristolochene catalysis..... | 4 |
| Figure S2 GC-MS profile of AGOH.....                                                            | 5 |
| Figure S3 GC-MS reaction product profiles of the TEAS enzyme.....                               | 6 |
| Figure S4 NMR spectra for AGPP.....                                                             | 7 |
| Figure S5 NMR spectra for geraniline.....                                                       | 8 |

**Table S1.** Data collection and refinement statistics.

*TEAS-geraniline complex* (Space group:  $P4_12_12$ , Cell parameters:  $a = b = 126.75$  Å,  $c = 124.3$  Å,  $\alpha = \beta = \gamma = 90.0^\circ$ )

**Data collection<sup>a</sup>**

|                                                |                               |
|------------------------------------------------|-------------------------------|
| Source                                         | Berkeley ALS Beamline BL8.2.1 |
| Wavelength (Å)                                 | 1.00                          |
| Resolution (Å)                                 | 44.37 - 2.47 (2.56 - 2.47)    |
| Multiplicity                                   | 8.2 (4.0)                     |
| Completeness (%)                               | 95.66 (79.13)                 |
| $\langle I \rangle / \sigma \langle I \rangle$ | 11.19 (1.13)                  |
| Wilson B-factors                               | 47.89                         |

**Refinement**

|                                    |                |
|------------------------------------|----------------|
| No. reflections                    | 291261 (11363) |
| No. unique reflections             | 35313 (2870)   |
| No. of non-hydrogen atoms          | 4,481          |
| $R_{\text{work}}$ (%) <sup>b</sup> | 17.57 (0.3320) |
| $R_{\text{free}}$ (%) <sup>c</sup> | 22.51 (0.3782) |

| Model          | # of non-hydrogen atoms | Average B-factor |
|----------------|-------------------------|------------------|
| Macromolecules | 4,362                   | 71.9             |
| Ligands        | 59                      | 114.2            |
| Solvent        | 60                      | 54.3             |

|                                         |           |
|-----------------------------------------|-----------|
| Rmsd bond (Å) <sup>d</sup>              | 0.008     |
| Rmsd angle (°) <sup>d</sup>             | 1.03      |
| Ramachandran plot analysis <sup>d</sup> | 96 (0.19) |
| %favored (% outliers)                   |           |
| Average B-factor                        | 71.90     |

<sup>a</sup> $R_{\text{sym}} = \sum |I - \langle I \rangle| / \sum I$  where  $I$  is the integrated intensity of a given reflection, <sup>b</sup> $R_{\text{work}} = \sum |F(\text{obs}) - F(\text{calc})| / \sum F(\text{obs})$ , <sup>c</sup> $R_{\text{free}} = \sum |F(\text{obs}) - F(\text{calc})| / \sum F(\text{obs})$ , calculated using 5% of the data, <sup>d</sup>From *PHENIX Comprehensive Validation*

**Table S2.** Summary of kinetic constants determined for catalytic turnover of FPP to 5-epi-aristolochene in independent biological replicates. Bacterial expressed TEAS protein was isolated by affinity chromatography and incubated with a range of 1-<sup>3</sup>H-FPP concentrations (0.1 to 80  $\mu$ M) as well as 0.1 to 40  $\mu$ M AGPP for 30 min prior to determining the amount of hexane extractable, radiolabeled reaction products formed by scintillation counting.

|                     | replicate 1 |            | replicate 2 |            | replicate 3 |            | replicate 4 |            | replicate 5 |            | Average |
|---------------------|-------------|------------|-------------|------------|-------------|------------|-------------|------------|-------------|------------|---------|
|                     | Value       | $\pm$ S.E. |         |
| $V_{max}$ (pmol/hr) | 42.81       | 3.13       | 33.01       | 1.23       | 375.12      | 15.24      | 16.84       | 1.22       | 408.9       | 11.17      | 175.34  |
| $K_M$ ( $\mu$ M)    | 9.85        | 2.68       | 4.28        | 0.70       | 7.43        | 1.16       | 5.58        | 1.69       | 4.47        | 0.58       | 6.32    |
| $K_i$ ( $\mu$ M)    | 0.03        | 0.01       | 1.24        | 0.34       | 0.16        | 0.04       | 0.03        | 0.01       | .386        | 0.04       | 0.37    |
| $k_{cat}^{s^{-1}}$  | 6.00E-03    |            | 0.54E-03    |            | 20.8E-03    |            | 0.28E-03    |            | 31.5E-03    |            | .012    |
| Enzyme              | 40 nM       |            | 333 nM      |            | 100 nM      |            | 333 nM      |            | 72 nM       |            |         |

**Table S3.** Summary of kinetic constants determined for catalytic turnover of AGPP to geraniline by the TEAS enzyme in independent biological replicates. Bacterial expressed TEAS protein was isolated by affinity chromatography and incubated with 0.4 to 65  $\mu$ M AGPP for 0.5 to 1 hr at 37°C prior to determining the amount of geraniline formed by GC-MS.

|                     | replicate 1 |            | replicate 2 |            | replicate 3 |            | replicate 4 |            | replicate 5 |            | Average  |
|---------------------|-------------|------------|-------------|------------|-------------|------------|-------------|------------|-------------|------------|----------|
|                     | Value       | $\pm$ S.E. |          |
| $V_{max}$ (pmol/hr) | 351         | 53.5       | 194         | 27.2       | 105         | 7.5        | 75          | 27.3       | 370         | 109        | 219      |
| $K_M$ ( $\mu$ M)    | 12.9        | 5.24       | 11          | 4.35       | 3.4         | 0.75       | 11.2        | 12.9       | 2.4         | 3.8        | 8.18     |
| $k_{cat}^{s^{-1}}$  | 0.195E-03   |            | 0.11E-03    |            | 0.058E-03   |            | 0.042E-03   |            | 0.21E-03    |            | 0.12E-03 |
| Enzyme              | 1 $\mu$ M   |            |             |            |             |            |             |            |             |            |          |

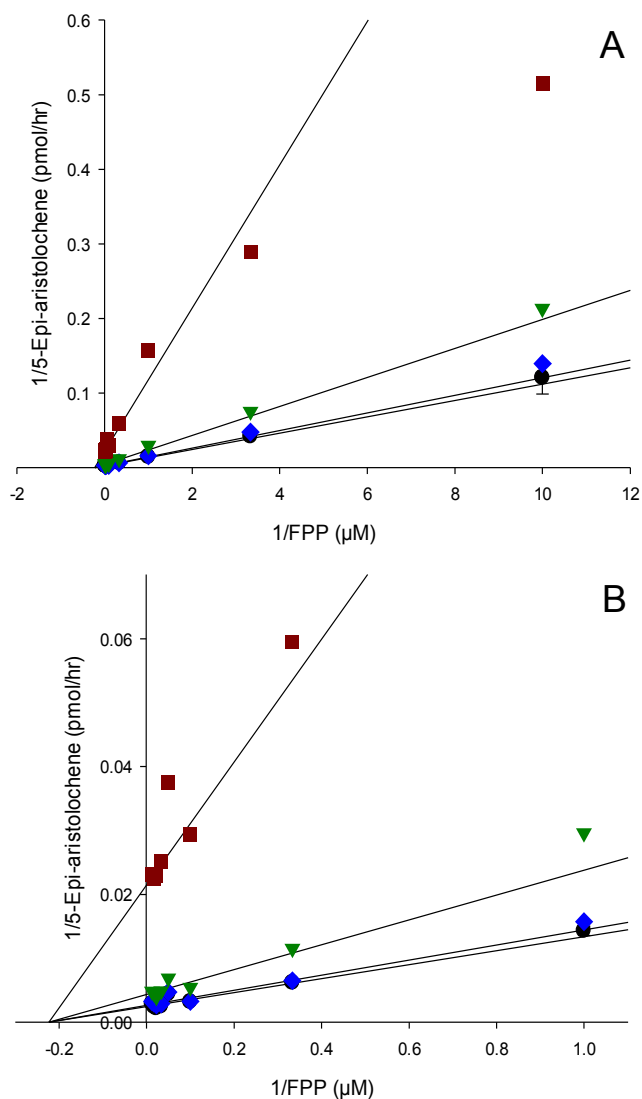

**Figure S1.** Lineweaver-Burk plots of AGPP inhibition of FPP to hydrocarbon (~98% 5-epi-aristolochene, see Fig. S3 upper panel), non-competitive, non-linear regression line fitting. 5-Epi-aristolochene synthase (72 nM) was incubated at the indicated concentrations of  $^3\text{H}$ -FPP in the absence (●) or presence of 0.03 (◆), 0.3 (▼), 3.0 (■)  $\mu\text{M}$  AGPP in 250 mM Tris, pH 7.5 and 50 mM  $\text{MgCl}_2$  at room temperature for 10 min. The reactions (50  $\mu\text{l}$ ) were terminated by addition of 50  $\mu\text{l}$  stop solution and then extracted with 300  $\mu\text{l}$  of hexane to partition the reaction products into the organic phase, which was treated with silica to remove any FPP and FOH formed from chemical decay or aborted catalysis. The amount of radioactivity incorporated into hydrocarbon reaction products was determined by scintillation counting an aliquot of the silica scrubbed hexane extract. Data were analyzed using the Enzyme Kinetics 1.3 software suite. Panel B is an enlargement of axis intercepts of panel A.

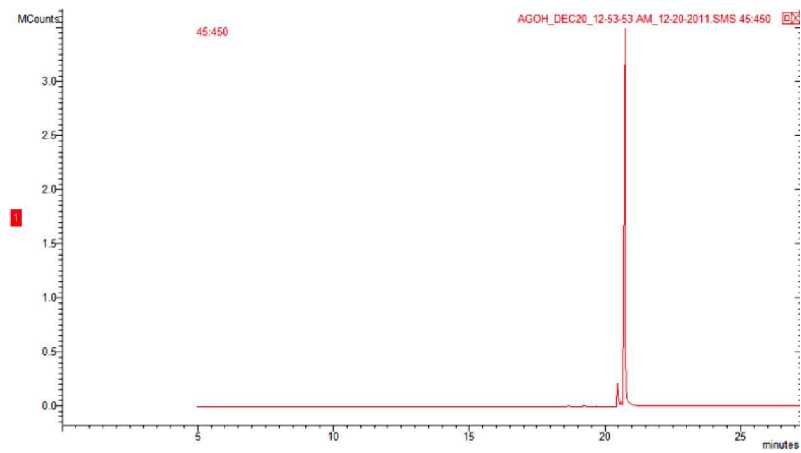

**Figure S2.** GC-MS profile of AGOH.

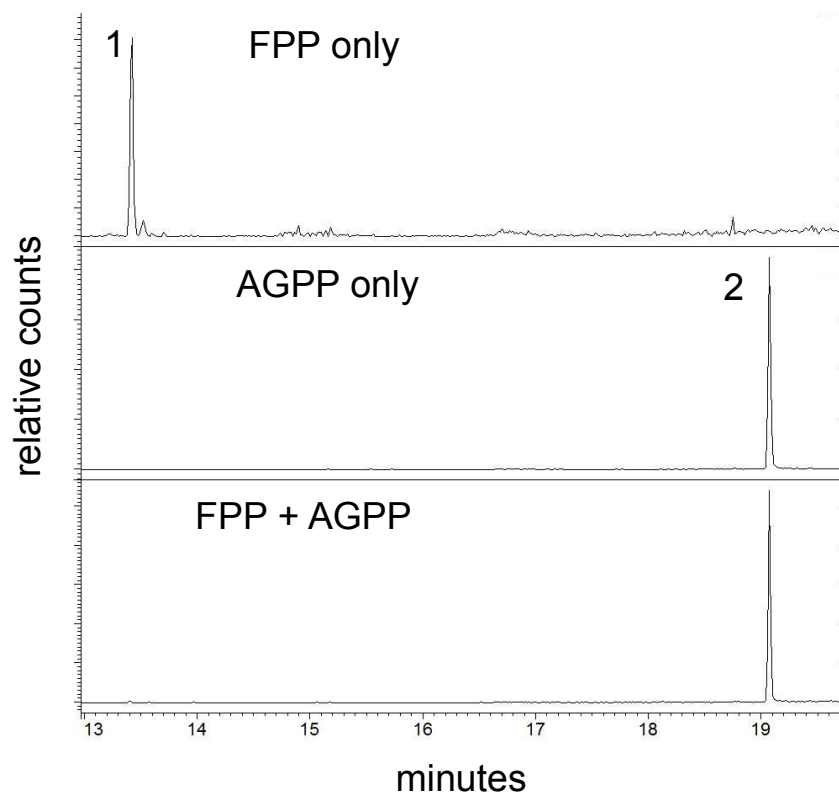

**Figure S3.** GC-MS reaction product profiles of the TEAS enzyme incubated with 20  $\mu$ M FPP (upper panel), 20  $\mu$ M AGPP (middle panel), or both (lower panel). Purified 5-epi-aristolochene synthase (1  $\mu$ M) was incubated with the indicated substrates for 0.5 hr at 37°C before the reaction products were extracted with hexane and evaluated by GC-MS. The MS for the peak appearing at 13.42 min (1) was identical to 5-epi-aristolochene, while the MS of the peak at 19.08 (2) was identical to that of geraniol.

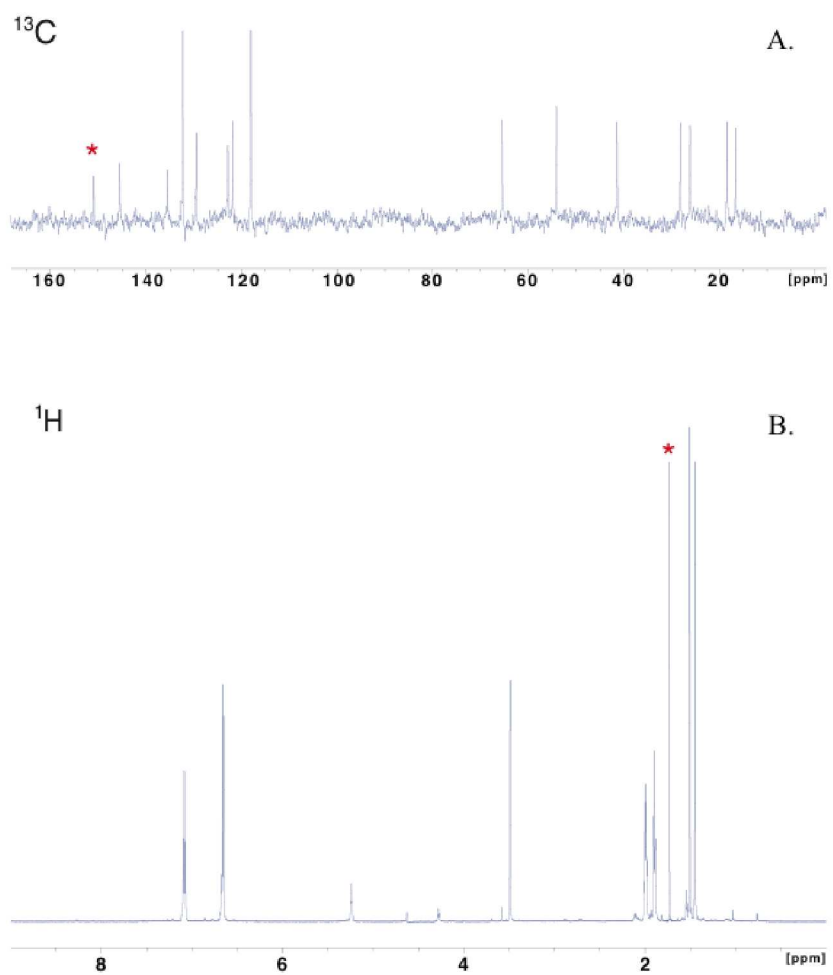

**Figure S4.** <sup>13</sup>C (A) and <sup>1</sup>H (B) NMR spectra of AGPP in D<sub>2</sub>O. The red asterisks denote a contaminate in this preparation.

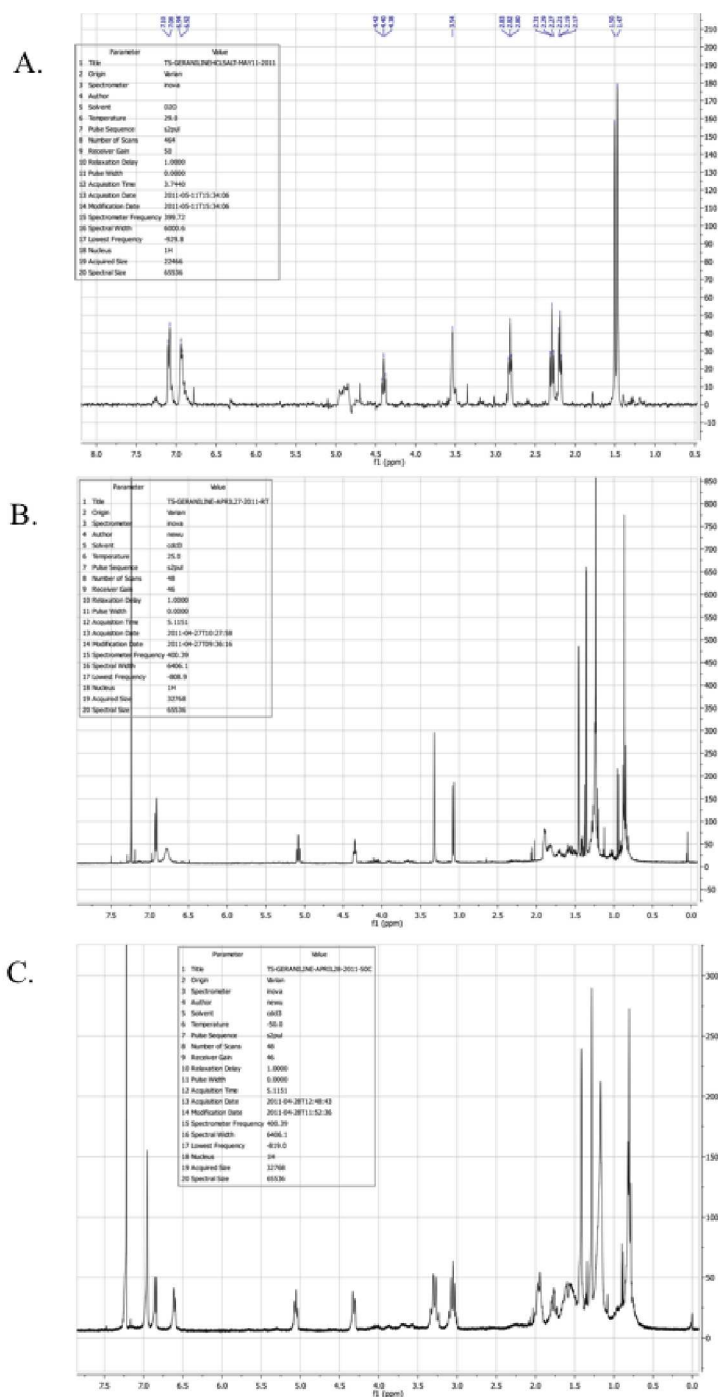

**Figure S5.** NMR spectra of geraniline.  $^1\text{H}$  NMR spectrum of geraniline•HCl in  $\text{D}_2\text{O}$  (A). One of the geraniline methine resonances is missing because it was suppressed by the pulse sequence and post-acquisition processing along with the residual HDO peak;  $^1\text{H}$  NMR spectrum of geraniline at  $25^\circ$  in  $\text{CDCl}_3$  (B); and  $^1\text{H}$  NMR spectrum of geraniline at  $50^\circ$  in  $\text{CDCl}_3$  (C).
